# Supplementary material for: Hsa_circ_0053943 drives uveal melanoma progression via regulating N6-methyladenosine modification of EGFR with IGF2BP3
Source: Research Square preprint supplement (doi:10.21203/rs.3.rs-1738662/v1), 2022-06-23
Supplement: Supplementary file 1 [file f63ebb30e8f1857ed48bd01a.xlsx]

## Sheet: Table S7
Table S7. RNA-binding protein (RBPs)
ID
TARDBP	SPTAN1	EEF1A1	ANP32B	RPL11	XRCC6	PRPF40B	RNPC3	DSP	SRPK1	FASTKD2	HEATR6	FAM120A	RPS21	NXF1	AKAP8	PDCD11	DHX57	EIF3J	HMG20B	RBMXL2
GRN	MKI67	DDX39B	PPP1R8	ADD1	GANAB	PRPF40A	STAU2	PRPF6	EIF5A2	LIN28B	RBM39	RBFOX3	RPL27	EIF4ENIF1	PWP1	PLRG1	DDX28	WDR33	HSPA7	PUS7
LRP1	UBC	ELAVL1	MRPL10	HUWE1	SYNE1	RRS1	RALY	PRPF4	SRP72	PES1	LARP1	RBFOX2	LRRC59	DUT	NPM3	MPHOSPH10	DDX27	CSTF2	BUD31	FAM133B
HSD17B10	YWHAE	RPS3A	NOC3L	PSMD4	TCERG1	MTDH	FSCN1	EIF2S2	PTBP2	UPF3B	DHX38	BRDT	CAPRIN1	DYNC1LI1	SLU7	PDAP1	DNTTIP2	MRPS30	MRPS23	RRP7A
VCP	CTNNA1	ADARB1	RRP1	HDAC2	ACAA2	HLTF	TOP2A	SNRPD3	MRPL28	MRPL44	BCLAF1	RBPMS	CLNS1A	SLBP	MEX3C	GRWD1	PPAN-P2RY11	MRPL41	ARL6IP4	CHCHD1
FUS	APEX1	C4BPA	EIF4A1	SUMO1	ROCK2	EXOSC9	FIP1L1	SNRPD1	KHDRBS3	EPPK1	PPAN	FXR1	DARS	MKRN1	POLR1E	RPF2	HMGN5	DUS3L	WDR25	SLC16A3
JUN	RAN	PPP1R9B	ZRSR2	TUFM	PURA	CHD3	ZC3HAV1	SNRPE	HMGB2	MRPL3	TPD52L2	NOMO1	EIF1B	MAP4	DZIP3	PWP2	CD3EAP	METTL16	PPIH	R3HDM1
EIF2AK2	SNRNP70	PSMC1	SREK1	PCBP2	POLR2A	SCNM1	OASL	SNRPG	SND1	SNIP1	NOP2	API5	SF3B5	TFIP11	MEPCE	FCF1	DHX35	ZRSR1	S100A16	MRPL45
ATXN2	HSPA1A	PEG10	PRPF18	NKRF	RPS15	RBM5	RNPS1	GAR1	SART1	THOC6	PPIE	RPL3	RPS25	NAA38	USP39	SRP68	PAPOLA	RPS19BP1	THOC3	ERI3
NQO1	TXN	C1QBP	ZNF326	RPS8	RPL7A	NOP14	BUD13	SNRPF	KTN1	NUFIP2	ILF3	TES	SYF2	SUB1	WDR3	SUPT16H	WDR6	RBM7	NTPCR	C1orf131
RPS27A	ELAC2	UBE2I	RRP12	RPS9	RPS20	UBTF	NCOA5	SNRPB2	PSIP1	ZFR	SAMD4A	SUPT5H	EDF1	MFAP1	CCDC86	ZNHIT6	PNISR	MRPS31	PRPF4B	C1orf204
HNRNPA1	RBM25	NACA	ZCCHC24	RBM3	PUF60	SNW1	HOXB6	EIF4H	YTHDF1	WDR43	CWC22	ACIN1	GRSF1	DNAJC2	DDX55	NOL11	MRPS28	SURF2	RPL8	MTIF2
AATF	ALDH18A1	HMGCS2	ADARB2	ANXA2	HSPA1L	ZCCHC6	RRP9	SRSF2	H1F0	TOP3B	SRP14	MYO18A	SEC61A1	SUPT6H	DHX29	NOC4L	GPATCH8	ZNF385A	CPSF3	MTHFSD
EIF2S1	YWHAH	NCL	TRA2B	PSPC1	RPS2	AKAP8L	XAB2	NOVA2	USP10	RPL21	YTHDC1	CTNNBL1	ARCN1	PRPF19	DDX51	TEX10	PARP12	REPIN1	LRRC47	FAM50A
DCN	CAST	GTPBP4	UTP20	SF3B3	RPS3	ZFP36	ZC3H10	CRKL	ABCF1	R3HDM2	ZC3H4	RPL30	TBRG4	THOC5	DDX54	NOP16	RPN1	MRPL32	WBP4	FAM32A
CDKN2A	GRB2	MARK2	CSTF2T	SLC25A5	WBSCR22	LUC7L2	NLRP11	CSRP1	RPL10	G3BP1	PRMT7	C15orf52	PAK1IP1	DHX30	APOBEC3F	RRP36	C11orf68	ZC3H7B	SUGP2	MRPS15
HSPD1	TPT1	SORBS2	CPEB3	PPIL4	RPS27	SRSF4	DHX16	FXR2	EIF4G3	MOV10	PCF11	DDX17	FASTKD5	YBX2	TRIM56	MAK16	NOM1	RBMX2	THOC7	NOL12
HNRNPA2B1	YLPM1	NOLC1	RBM45	SYNCRIP	RPL23A	SUMO2	DROSHA	KHDRBS1	HIST1H1E	SRSF10	ALDH6A1	DIAPH1	ZNF593	HNRNPLL	FAM103A1	FARSB	RPL36	LSM14B	CLK4	CELF3
RBM8A	EBNA1BP2	BICC1	HLA-A	RBM19	RPS16	EIF3E	SNRNP35	LSM1	RPL26	DDX3X	ALKBH5	POP1	RBBP6	KHDRBS2	NUPL2	MRTO4	MKRN2	NMD3	RPL35	MAGOHB
TFAM	TTF2	YWHAZ	TARDBP	C14orf166	MANF	ECH1	MRPL19	LSM7	RPL17	CEBPZ	EIF5B	FUBP1	TRIM71	AEN	APOBEC3H	EMG1	DDX50	MRPL15	PTCD3	MRPL39
WT1	MTPAP	ELAVL2	PFN1	EEF1G	NUCKS1	RBMXL1	AFF2	TGS1	SRPK2	YBX1	TCF20	XPO5	TXNL4A	LUC7L3	IPO5	HNRNPCL1	DAZAP1	RPUSD3	STRAP	PABPC5
CSTB	UBE2D1	PPP1R10	MATR3	RBMS2	RPL13	LUC7L	TSEN54	LSM5	BOP1	MBNL2	MRPS24	BYSL	NBPF10	C7orf50	RRP8	GNL2	EIF5	RPUSD4	ZC3H13	CPEB2
CALR	TCP1	ELAVL3	HSPB1	RBMS1	LSM14A	BTF3	RARS2	LSM4	BZW1	RPSA	SAMD4B	SEC61B	DAZL	PDIA4	RC3H1	HNRNPUL1	DAP3	PHAX	ZC3H8	MRPL1
HSPA8	ATP5C1	CKAP4	SMN1	PDIA3	RPL28	PABPC4	DDX20	LSM3	SRRT	MYBBP1A	WDR36	IVNS1ABP	LGTN	RBM26	HMGB3	WDR77	C11orf31	MRPL11	CD2BP2	CELF5
FLNA	FASN	PPP2CA	GFM1	RAVER1	YWHAG	PPIL1	RPGR	LSM6	CDK13	ANKRD17	MRPL9	DHX32	TCF25	SURF6	DHX36	GLTSCR2	ZNF768	MRPL4	THRAP3	CELF4
PPARGC1A	UBE2L3	MSI1	NAP1L1	GOT2	RPL10A	SAFB	RBM10	GEMIN8	APEH	SRSF1	TRUB2	ESRP1	CPEB1	RBM23	DGCR14	GSPT1	HDLBP	C12orf43	CLK2	FAM120C
DYNC1H1	GPX4	HNRNPH3	TNPO1	HSP90AB1	RPS11	ZFC3H1	TSEN2	HNRNPM	SECISBP2	HIST1H1D	CPSF2	JMJD6	DAZ3	LSM10	HERC5	ZNF579	NOP58	LSG1	SLC25A11	RPP25
MECP2	PRKRA	EXOSC1	NOP56	FAM98A	U2AF1	YTHDF3	CNBP	GEMIN5	RBM15	SUCLG1	SSRP1	EIF3C	PUM2	SRRM1	URB2	ZNF638	DDX31	MRPL14	ZRANB2	CELF6
HMGB1	HNRNPDL	BMS1	DUSP11	HNRNPD	TBCA	ZCCHC17	TSEN34	S100A4	SRSF6	ZFP36L2	ALYREF	EIF4B	APOBEC3B	RPS15A	DDX56	PRPF38A	GPATCH4	MRPS21	U2SURP	ISG20L2
HSPG2	RBM4	HIST1H1B	SSR1	HNRNPU	TRAP1	UTP14A	HNRNPR	IGF2BP3	PUS1	XIRP1	DEK	KIAA1324	DAZ2	FUBP3	WDR83	EXOSC4	CSTF3	SRP19	RBM15B	MRPS12
TFRC	DDX21	RPS23	PRMT1	HNRNPL	PPHLN1	PHF5A	PLEC	SPEN	SARNP	NUSAP1	AHNAK	EIF4A2	SSBP3	ZC3H15	APOBEC3C	SNRPC	HNRNPUL2	MRPL27	RBM27	PEF1
HSPA9	MAZ	RPL4	UPF1	HNRNPA3	USP36	TOP1	YARS	SPTBN1	ZCCHC7	NOL3	RSL1D1	LYAR	ZNF622	HNRNPA0	SAFB2	EXOSC6	UCHL5	GEMIN7	THUMPD1
ADAR	PRDX1	CCAR1	XRN2	SERBP1	HIST1H1C	MYOD1	IBA57	NAP1L4	TUT1	CHD2	RBMX	GTF2F1	UNK	LARP4	TNRC6A	ESF1	CPSF4	MRPS5	RBM33
RTN4	QKI	ANXA7	RBFOX1	SF3A3	NMT1	BST2	LAS1L	NHP2	ZCCHC11	RPL36A	HIST2H4B	RBM47	RPS4X	YTHDF2	SAMSN1	RRP1B	GTF2E2	MRPL54	LARP1B
ATP5A1	NDUFV3	CDK11B	PABPN1	RPL19	SRRM2	PPIG	PHF6	SSB	PRRC2A	RPL24	HIST1H4H	FASTKD3	ZNF598	TNRC6B	TDRD3	XRN1	PCDH20	PTRH1	ZC3H7A
STXBP1	RPS6	TFB1M	SERPINH1	SF3A1	SMG1	FBL	TACO1	HDGF	C1orf35	RPL23	SRSF5	EIF3D	STRBP	ANKHD1	NAT10	LARP4B	MRPL42	ZCCHC9	CWC15
TPI1	ANXA11	EIF3A	UBA1	RPS14	MRPS9	EXOSC10	DKC1	ARHGEF1	PRRC2B	RPL37A	SRSF9	FASTK	RBPMS2	RBM6	RPS27L	HNRNPH2	MRPS11	MRPS14	MRPS27
LBR	SCG3	ATXN2L	TAF15	RPS5	ZMAT5	TBL2	PRPF31	CANX	DUSP14	PNN	A1CF	PKN2	NKAP	OTUD4	DDX52	HNRNPA1L2	BCCIP	RRP15	EIF3G
NME1	ADK	PRMT5	FMR1	ERAL1	WBP11	IFI16	PQBP1	RPL32	SEC63	MCAT	WDR46	PCBP1	SRPK3	NAF1	DHX33	SMU1	NOL7	MRPL20	SRP54
HSP90AA1	SNRPA	SEC23IP	SON	RPL14	NOVA1	RPS17	MYO5A	COL14A1	SRFBP1	H1FX	RPS18	L1TD1	RC3H2	SDAD1	ASCC3	POLDIP3	SECISBP2L	TRMT1	ZCCHC8
FLNB	RSRC1	IFIT5	NPM1	SNRPD2	UBE2N	SBDS	SMC1A	FNDC3A	UTP3	FAM46A	FBRSL1	MRPL13	SCAF4	SF3B2	FTSJ3	REXO4	DNAJC21	TRMT6	ZC3H11A
HSPA5	TSNAX	SUPV3L1	ZNFX1	RPL12	U2AF2	METAP2	LRPPRC	PELP1	PTCD2	CLK3	RPL6	EIF3CL	RRBP1	KRR1	YTHDC2	EXOSC2	NOMO2	CWC25	CCDC9
HADHB	IMMT	RPP30	AQR	SSBP1	WDR75	RPL7	GNL3	EIF5A	DIS3	CSNK1E	PRR3	PRPF38B	CIR1	SLIRP	CSTF1	ZCCHC3	RBM46	DIMT1	DDX46
ASS1	ARF1	TIAL1	DBR1	NUDT21	PRPF8	CISD2	PARN	SLC3A2	YARS2	PPP1CC	HK2	GTPBP1	WTAP	NGDN	RBM38	NVL	NOMO3	DIEXF	FLYWCH2
ACTB	FARSA	PPRC1	PPIA	UBAP2L	CLTC	EZR	SNRNP200	FKBP3	EFTUD2	PUM1	NUMA1	RTF1	SRRM4	CDC42EP4	PNO1	CCDC124	CIRBP	DNAJC17	RBM12B
ALDOA	EIF4E	RBM17	SF3B4	UBFD1	POLR2B	RPL5	ALG13	IGF2BP2	TPR	GOLGB1	IGF2BP1	NOC2L	LARP7	RPL27A	MEX3B	UTP15	MRPS7	ESRP2	MYEF2
ENO1	CELF2	GDI2	LGALS3	UBAP2	CHERP	PRKDC	KIF1C	HNRNPAB	RBM20	CPEB4	FAU	TAGLN2	SAP18	UBE2O	RPL13A	TRMT2A	RBMS3	TRA2A	RBMY1F
ACTN4	CELF1	HNRNPF	SF1	NGRN	POLR2I	XRCC5	RNU4ATAC	TMSB4X	NSUN5	CASC3	CWC27	CNOT1	EIF4G2	RCC2	MSI2	URB1	INTS6	ETF1	RBMY1E
EEF2	PEBP1	SCAF11	HNRNPK	CCT3	POLR2J	RDX	MTO1	ILF2	RPL35A	DHX9	EIF3H	NOL10	DDX10	PDIA6	DMGDH	TSR1	CCDC59	NOSIP	RBMY1B
FDPS	POLR2L	TFB2M	PPP2R1A	CCT6A	POLR2C	TIA1	SNRPB	TRIM28	RPS26	DDX18	DDX39A	POLRMT	EIF2D	PPP4R2	RPF1	UTP18	ENOX1	TWISTNB	RBMY1J
PARP1	ABT1	ZYX	KRT18	NONO	POLR2D	HMGN2	SNRPN	PPIB	RPS19	DDX6	NAA15	TRMT1L	EIF4E2	PATL1	SNRNP27	UTP6	THOC1	SRSF8	RBMY1D
DNM1	ELAVL4	ANP32A	LGALS1	CCT4	HSPE1	RIMS1	CLP1	XPO1	NSUN2	RPL31	SF3B1	RPS13	PURB	TCEA1	MRPS26	KRI1	MACF1	FNDC3B	MAGOH
PCSK9	KPNA2	KHSRP	KPNB1	TXNL4B	POLR2F	CORO1A	SNTB2	RPLP0	RPS24	LTA4H	KCTD12	RPL18A	RPL22	EIF1AX	BRIX1	NOL6	NIP7	MBNL3	SLTM
FKBP4	SMNDC1	GLRX3	PABPC1	CPSF6	POLR2K	ZFP36L1	DDX23	PTRF	RPS7	THOC2	OLA1	SRSF7	NASP	NOL8	HEATR1	NSA2	NOA1	RRAGC	SNRPA1
PTPN1	HSP90B1	SRSF3	EWSR1	DHX15	POLR2E	POU5F1	MBNL1	STIP1	RPL15	ZC3H14	ZMAT3	AKAP17A	HTATSF1	STAU1	RBM34	CCDC137	CGGBP1	BCAS2	ZC3H18
SFPQ	HSPA1B	PRRC2C	CDC5L	DDX5	POLR2G	HELZ	TNS1	IMP3	RPS10	ZNF346	ZAK	MEX3A	SRSF11	CCDC94	IMP4	DDX47	PCBP4	CPNE3	CCDC12
RP9	PTBP1	PPIL2	HNRNPH1	DDX42	POLR2H	MYH9	LSM2	RPL29	RPS28	MRPL40	PA2G4	DIDO1	HEXIM1	TWF2	SKIV2L2	DHX8	CDK12	CPSF1	CDC40
P4HB	ACTN1	BZW2	DDX1	GIGYF2	LIN28A	HNRNPC	RBM28	EIF4A3	SARS2	DAZ4	EED	ERH	CCDC47	CSDE1	SPATS2L	DDX24	PURG	FYTTD1	CNOT4
CS	MDH2	MRPL43	PNPT1	EIF4G1	NCBP1	BAG4	PRPF3	DCD	FRG1	DAZ1	RPS12	RBM14	SART3	KIAA1429	SPATS2	CRNKL1	C1orf52	GSPT2	CPSF7
TUBB	MAPRE1	IFIT2	HARS2	DDX41	CLK1	USO1	TCOF1	TRIP6	TSFM	TRIM25	SCAF1	AKAP1	G3BP2	RBM12	TBL3	DCAF13	TRPT1	RBMY1A1	DNAJC8
